# Supplementary material for: The Role of Prompt Engineering for Multimodal LLM Glaucoma Diagnosis
Source: bioRxiv or medRxiv preprint supplement (doi:10.1101/2024.10.30.24316434), 2024-11-01

# Supplementary Materials

## Evaluating Multimodal LLMs in Glaucoma Diagnosis: The Role of Prompt Engineering

### Table of contents

|                                                                                 |          |
|---------------------------------------------------------------------------------|----------|
| <b>Section 1: The prompts.....</b>                                              | <b>2</b> |
| <b>Section 2: Validated image references for model learning.....</b>            | <b>4</b> |
| <i>Unlikely Glaucomatous two expert ophthalmologist validated images: .....</i> | <i>4</i> |
| <i>Likely Glaucomatous two expert ophthalmologist validated images: .....</i>   | <i>5</i> |
| <b>Section 3: Detailed Statistical Analysis .....</b>                           | <b>6</b> |

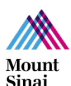

## Section 1: The prompts

- **Simple prompt without examples:**

Hello, your task is to perform a preliminary analysis of the attached fundus photograph to determine whether they show signs of Glaucoma. You are required to classify the photograph as either 'Likely Glaucomatous' or 'Likely Non-Glaucomatous' based on observable features.

Classify this image as either 'Likely Glaucomatous' (1) or 'Likely Non-Glaucomatous' (0). Respond with only 0 or 1.

- **Prompt-Engineered Prompt without examples:**

You are an expert ophthalmologist specializing in glaucoma detection through the analysis of fundus photographs. Your task is to assess the attached fundus photograph and provide a preliminary diagnosis, classifying it as either "**Likely Glaucomatous**" or "**Likely Non-Glaucomatous**".

When analyzing the image, focus on key indicators such as:

- Optic disc cupping
- Neuroretinal rim thinning
- Peripapillary atrophy
- Retinal nerve fiber layer defects

Ensure the diagnosis is balanced, avoiding both overdiagnosis and underdiagnosis. Your goal is to offer a well-reasoned, expert-level judgment based on observable features.

Classify this image as either 'Likely Glaucomatous' (1) or 'Likely Non-Glaucomatous' (0). Respond with only 0 or 1.

- **Simple prompt with examples:**

Hello, your task is to perform a preliminary analysis of the attached fundus photograph to determine whether they show signs of Glaucoma. You are required to classify the photograph as either 'Likely Glaucomatous' or 'Likely Non-Glaucomatous' based on observable features.

Classify this image as either 'Likely Glaucomatous' (1) or 'Likely Non-Glaucomatous' (0). Respond with only 0 or 1. Use the provided example images as reference templates for accurate classification.

- **Prompt-Engineered Prompt with examples:**

You are an expert ophthalmologist specializing in glaucoma detection through the analysis of fundus photographs. Your task is to assess the attached fundus photograph and provide a preliminary diagnosis,

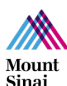

classifying it as either "**Likely Glaucomatous**" or "**Likely Non-Glaucomatous**".

When analyzing the image, focus on key indicators such as:

- Optic disc cupping
- Neuroretinal rim thinning
- Peripapillary atrophy
- Retinal nerve fiber layer defects

Ensure the diagnosis is balanced, avoiding both overdiagnosis and underdiagnosis. Your goal is to offer a well-reasoned, expert-level judgment based on observable features.

Classify this image as either 'Likely Glaucomatous' (1) or 'Likely Non-Glaucomatous' (0). Respond with only 0 or 1. Use the provided example images as reference templates for accurate classification.

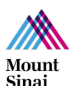

## Section 2: Validated image references for model learning

Unlikely Glaucomatous two expert ophthalmologist validated images:

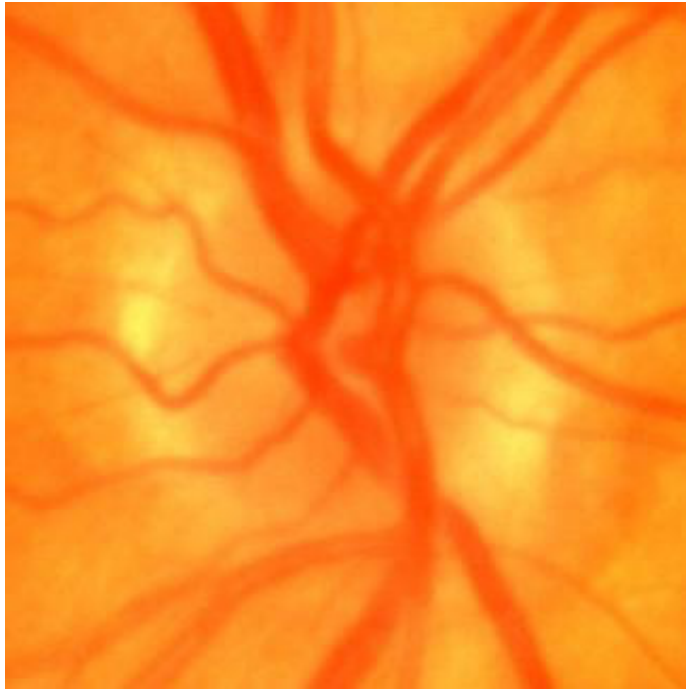

Unlikely Glaucomatous reference image 1

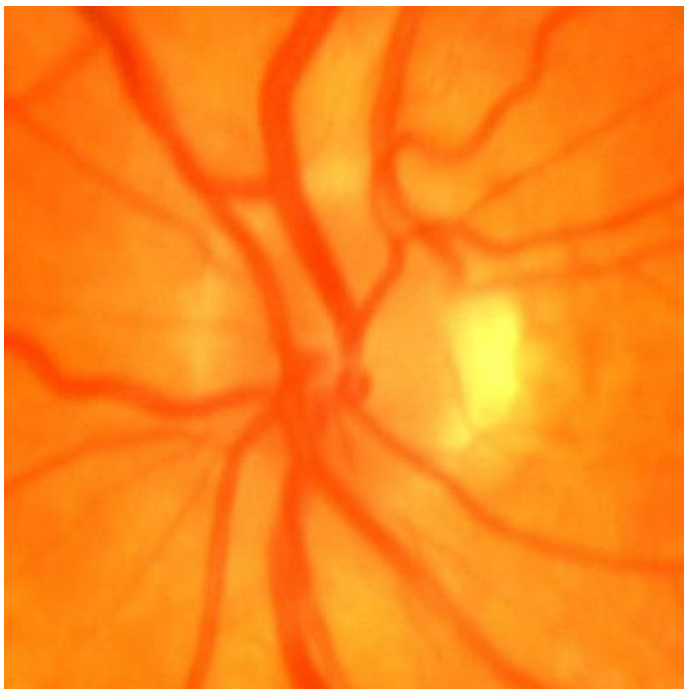

Unlikely Glaucomatous reference image 2

Likely Glaucomatous two expert ophthalmologist validated images:

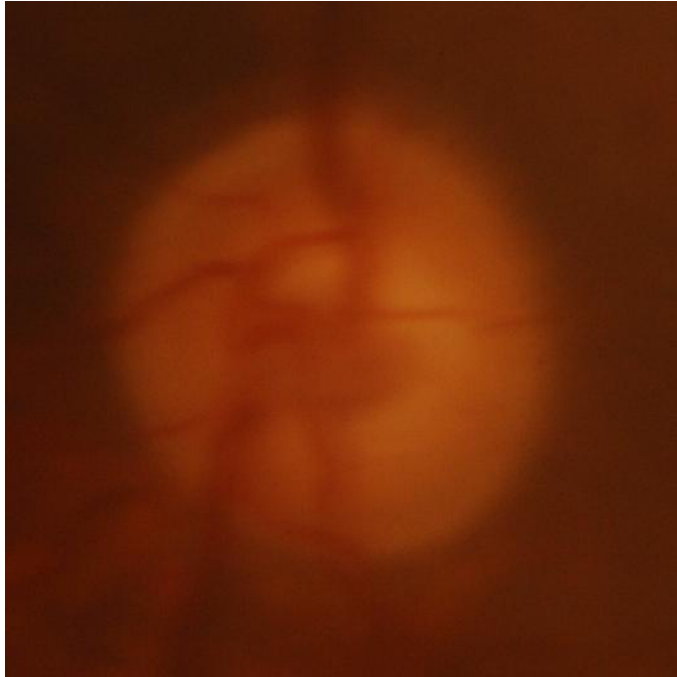

Likely Glaucomatous reference image 1

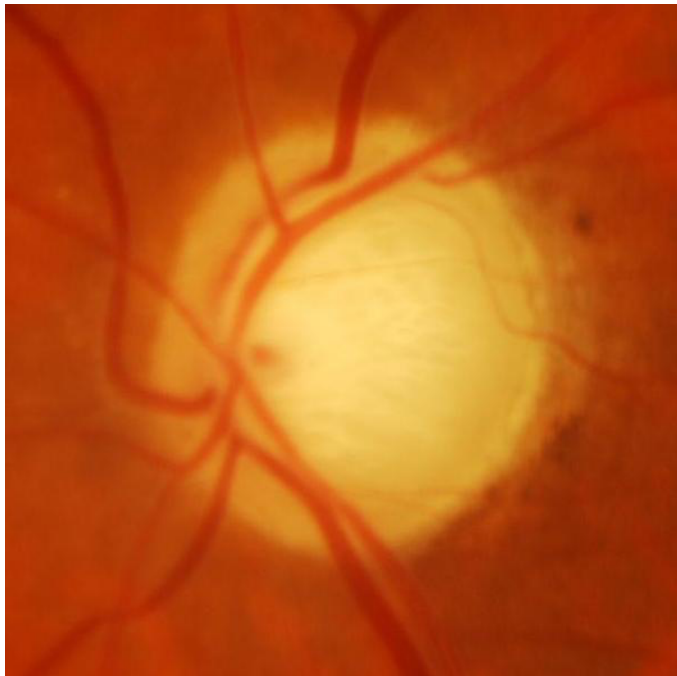

Likely Glaucomatous reference image 2

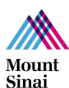

## Section 3: Detailed Statistical Analysis

In this section, we outline the detailed statistical methodology used to evaluate and compare the performance of GPT-4o and Claude Sonnet 3.5 for glaucoma detection.

### 1. Descriptive Statistics

For each model iteration, we calculated descriptive statistics, including:

- **Mean and Standard Deviation (SD)** for accuracy, sensitivity, specificity, positive predictive value (PPV), and negative predictive value (NPV). These were computed across all test images, both glaucoma and non-glaucoma, for all four prompt types (simple, simple with examples, prompt-engineered, and prompt-engineered with examples).

### 2. Normality Testing

We first tested the normality of the distribution for each performance metric using the **Shapiro-Wilk Test**:

- For each model iteration and each diagnostic metric, the test was applied to determine whether the data followed a normal distribution.
- **Result:** Most data were not normally distributed (Shapiro-Wilk p-value < 0.05), leading to the use of non-parametric statistical tests.

### 3. Non-Parametric Tests

Given the non-normal distribution of the data, non-parametric statistical methods were applied:

- **Kruskal-Wallis Test:**
  - Used to assess whether there were statistically significant differences in performance between the four model iterations for each model (GPT-4o and Claude Sonnet 3.5).
  - Applied separately for the glaucoma and non-glaucoma datasets.
  - Null Hypothesis (H<sub>0</sub>): All model iterations have the same performance distribution.
  - **Interpretation:** A p-value < 0.05 indicated significant differences between the model iterations.
- **Mann-Whitney U Test** (Wilcoxon rank sum test):



- Pairwise comparisons were conducted between individual model iterations within each dataset (e.g., comparing GPT\_WE to GPT++, Claude\_WE to Claude++).
- Additionally, GPT-4o and Claude Sonnet 3.5 were compared to assess whether there were significant differences in their overall performance across all iterations.
- **Bonferroni correction** was applied to adjust p-values for multiple comparisons, ensuring conservative estimates of significance.

#### 4. Variance Testing

- **Levene's Test** was used to assess the homogeneity of variances across model iterations, ensuring that the data met the assumptions required for the applied tests.
  - Null Hypothesis (H0): The variances between the model iterations are equal.
  - A p-value < 0.05 indicated that the variances were significantly different, suggesting variability in performance consistency across iterations.

#### 5. F1 Score

- The F1 Score was calculated for each model by combining the precision (PPV) and recall (sensitivity) across all prompt types and iterations to provide a balanced performance measure
  - The overall performance of GPT-4o and Claude Sonnet 3.5 was compared using the F1 scores.
  - The Mann-Whitney U Test was used to compare the F1 scores between GPT-4o and Claude Sonnet 3.5 to quantify their general diagnostic performance across both glaucoma and non-glaucoma datasets.

#### 6. Sensitivity, Specificity, PPV, and NPV Calculations

We calculated the sensitivity, specificity, PPV, and NPV for each model iteration using the following formulas:

- **Sensitivity:**  $\text{True Positives} / (\text{True Positives} + \text{False Negatives})$
- **Specificity:**  $\text{True Negatives} / (\text{True Negatives} + \text{False Positives})$
- **PPV (Positive Predictive Value):**  $\text{True Positives} / (\text{True Positives} + \text{False Positives})$



- **NPV (Negative Predictive Value):**  $\text{True Negatives} / (\text{True Negatives} + \text{False Negatives})$

Each of these values was calculated separately for both glaucoma and non-glaucoma datasets, and the results were averaged across all prompt types and iterations to provide a holistic performance view.



Supplement: Supplementary file [file media-1.pdf]
